# Supplementary material
Source: PubMed Central journal article supplement (PMC5593130)
Supplement: NIHMS900461-supplement-Supplement_2.pdf [file NIHMS900461-supplement-Supplement_2.pdf]

## Supplementary Online Content

Moon RY, Hauck FR, Colson ER, et al. The effect of nursing quality improvement and mobile health interventions on infant sleep practices: a randomized clinical trial. *JAMA*. doi:10.1001/jama.2017.8982

**eTable 1.** Video topics

**eTable 2.** Demographic characteristics of respondents and non-respondents at enrollment during birth hospitalization

**eTable 3.** Characteristics of Study of Attitudes and Factors Effecting Infant Care Practices (SAFE) study participants at enrollment during birth hospitalization, used to calculate baseline rates of infant care practices

**eTable 4.** Effects of the Nursing Quality Improvement and Mobile Health interventions by maternal survey at infant age  $\geq 60$  days, imputation analysis

**eTable 5.** Safe sleep outcomes of Breastfeeding Nursing Quality Improvement/Breastfeeding Mobile Health (control) and Safe Sleep Nursing Quality Improvement/Safe Sleep Mobile Health Groups, by race/ethnicity, when infant was  $\geq 60$  days of age

**eFigure.** Safe sleep outcomes of Breastfeeding Nursing Quality Improvement/Breastfeeding Mobile Health (control) and Safe Sleep Nursing Quality Improvement/Safe Sleep Mobile Health Groups, by race/ethnicity, when infant was  $>60$  days of age

**eReferences**

This supplementary material has been provided by the authors to give readers additional information about their work.

**eTable 1.** Video topics

| <b>Safe Sleep</b>                                                                                                                                                                                                                                                                                                                                                                               |
|-------------------------------------------------------------------------------------------------------------------------------------------------------------------------------------------------------------------------------------------------------------------------------------------------------------------------------------------------------------------------------------------------|
| Importance of sleep position<br>Choking and sleep position<br>Importance of sleep space<br>Bedsharing<br>Handling advice from others<br>Mattress safety<br>Soft bedding<br>Feeding baby in bed<br>Pacifiers<br>Dangers of smoking<br>Infant sleep patterns                                                                                                                                      |
| <b>Breastfeeding</b>                                                                                                                                                                                                                                                                                                                                                                            |
| Importance of breastfeeding<br>How to start breastfeeding<br>How often to breastfeed<br>Hunger cues<br>What to do if baby is always hungry<br>Benefits of breastmilk<br>How long it takes for milk to come in<br>Latching on<br>Avoiding breast discomfort/pain<br>Dealing with fussy baby<br>Getting support from others<br>Economics of breastfeeding<br>Breastfeeding when returning to work |

**eTable 2.** Demographic characteristics of respondents and non-respondents at enrollment during birth hospitalization

|                                               | <b>Respondents</b> | <b>Non-respondents</b> | <b>Total</b> | <b>Chi-sq. p-value*</b> |
|-----------------------------------------------|--------------------|------------------------|--------------|-------------------------|
|                                               | N=1263             | N=337                  | 1600         |                         |
|                                               | N (%)              | N (%)                  | N (%)        |                         |
| <b>Infant sex</b>                             |                    |                        |              | 0.5206                  |
| Male                                          | 616 (48.8)         | 171 (50.7)             | 787 (49.2)   |                         |
| Female                                        | 647 (51.2)         | 166 (49.3)             | 813 (50.8)   |                         |
| <b>Parity</b>                                 |                    |                        |              | 0.2039                  |
| 1                                             | 526 (41.6)         | 140 (41.5)             | 666 (41.6)   |                         |
| 2                                             | 419 (33.2)         | 98 (29.1)              | 517 (32.3)   |                         |
| ≥3                                            | 318 (25.2)         | 99 (29.4)              | 417 (26.1)   |                         |
| <b>Mother's Age</b>                           |                    |                        |              | <.0001                  |
| Less than 20 y                                | 85 (6.7)           | 37 (11.0)              | 122 (7.6)    |                         |
| 20-29 y                                       | 644 (51.0)         | 205 (60.8)             | 849 (53.1)   |                         |
| 30 or more y                                  | 534 (42.3)         | 95 (28.2)              | 629 (39.3)   |                         |
| <b>Mother's Race/Ethnicity</b>                |                    |                        |              | <.0001                  |
| Non-Hispanic White                            | 414 (32.8)         | 71 (21.1)              | 485 (30.3)   |                         |
| Non-Hispanic Black                            | 344 (27.2)         | 133 (39.5)             | 477 (29.8)   |                         |
| Hispanic                                      | 408 (32.3)         | 112 (33.2)             | 520 (32.5)   |                         |
| Other                                         | 97 (7.7)           | 21 (6.2)               | 118 (7.4)    |                         |
| <b>Mother's Education</b>                     |                    |                        |              | <.0001                  |
| Less than high school                         | 88 (7.0)           | 44 (13.1)              | 132 (8.3)    |                         |
| High school or GED**                          | 312 (24.8)         | 117 (34.8)             | 429 (26.9)   |                         |
| Some college                                  | 438 (34.8)         | 110 (32.7)             | 548 (34.4)   |                         |
| College or more                               | 420 (33.4)         | 65 (19.3)              | 485 (30.4)   |                         |
| <b>Marital Status</b>                         |                    |                        |              | <.0001                  |
| Married                                       | 640 (51.3)         | 106 (31.9)             | 746 (47.2)   |                         |
| Never married                                 | 552 (44.2)         | 209 (63.0)             | 761 (48.2)   |                         |
| Separated, divorced, or widowed               | 56 (4.5)           | 17 (5.1)               | 73 (4.6)     |                         |
| <b>Household Income</b>                       |                    |                        |              | <.0001                  |
| Less than \$20,000                            | 181 (14.3)         | 53 (15.7)              | 234 (14.6)   |                         |
| \$20,000-49,999                               | 239 (18.9)         | 73 (21.7)              | 312 (19.5)   |                         |
| \$50,000 or more                              | 435 (34.4)         | 57 (16.9)              | 492 (30.8)   |                         |
| Unknown                                       | 408 (32.3)         | 154 (45.7)             | 562 (35.1)   |                         |
| <b>Infant age at followup maternal survey</b> |                    |                        |              |                         |
| 8-11 weeks                                    | 917 (72.7)         | --                     | 917 (72.7)   | --                      |
| 12-15 weeks                                   | 172 (13.6)         | --                     | 172 (13.6)   |                         |

|             | <b>Respondents</b> | <b>Non-respondents</b> | <b>Total</b> | <b>Chi-sq. p-value*</b> |
|-------------|--------------------|------------------------|--------------|-------------------------|
| 16-19 weeks | 87 (6.9)           | --                     | 87 (6.9)     |                         |
| ≥20 weeks   | 87 (6.9)           | --                     | 87 (6.9)     |                         |

\*P-value specifies comparison between respondents and non-respondents

\*\*GED: General Equivalency Diploma

**eTable 3.** Characteristics of Study of Attitudes and Factors Effecting Infant Care Practices (SAFE)<sup>1,2</sup> study participants at enrollment during birth hospitalization, used to calculate baseline rates of infant care practices

|                                                 | <b>Study Group</b>   |                   |                      |                   |
|-------------------------------------------------|----------------------|-------------------|----------------------|-------------------|
|                                                 | <b>Breastfeeding</b> | <b>Safe Sleep</b> | <b>Breastfeeding</b> | <b>Safe Sleep</b> |
| <b>Nursing Quality Improvement Intervention</b> |                      |                   |                      |                   |
| <b>Mobile Health Intervention</b>               |                      |                   |                      |                   |
|                                                 | N=417                | N=387             | N=421                | N=379             |
|                                                 | N (%)                | N (%)             | N (%)                | N (%)             |
| <b>Infant sex</b>                               |                      |                   |                      |                   |
| Male                                            | 210 (50.4)           | 203 (52.5)        | 212 (50.5)           | 198 (52.4)        |
| Female                                          | 207 (49.6)           | 184 (47.5)        | 208 (49.5)           | 180 (47.6)        |
| <b>Parity</b>                                   |                      |                   |                      |                   |
| 1                                               | 184 (44.3)           | 138 (35.8)        | 149 (35.5)           | 159 (42.0)        |
| 2                                               | 137 (33.0)           | 139 (36.0)        | 142 (33.8)           | 120 (31.7)        |
| ≥3                                              | 94 (22.7)            | 109 (28.2)        | 129 (30.7)           | 100 (26.4)        |
| <b>Mother's Age</b>                             |                      |                   |                      |                   |
| Less than 20 y                                  | 30 (7.2)             | 33 (8.5)          | 24 (5.7)             | 39 (10.3)         |
| 20-29 y                                         | 213 (51.1)           | 197 (50.9)        | 222 (52.7)           | 213 (56.2)        |
| 30 or more y                                    | 174 (41.7)           | 157 (40.6)        | 175 (41.6)           | 127 (33.5)        |
| <b>Mother's Race/Ethnicity</b>                  |                      |                   |                      |                   |
| Non-Hispanic White                              | 155 (37.3)           | 93 (24.0)         | 155 (36.8)           | 117 (30.9)        |
| Non-Hispanic Black                              | 110 (26.4)           | 183 (47.3)        | 120 (28.5)           | 97 (25.6)         |
| Hispanic                                        | 99 (23.8)            | 72 (18.6)         | 96 (22.8)            | 130 (34.3)        |
| Other                                           | 52 (12.5)            | 39 (10.1)         | 50 (11.9)            | 35 (9.2)          |
| <b>Mother's Education</b>                       |                      |                   |                      |                   |
| Less than high school                           | 20 (4.8)             | 54 (14.0)         | 17 (4.0)             | 51 (13.5)         |
| High school or GED*                             | 86 (20.6)            | 109 (28.2)        | 100 (23.8)           | 87 (23.1)         |
| Some college                                    | 139 (33.3)           | 115 (29.7)        | 155 (36.8)           | 123 (32.6)        |
| College or more                                 | 172 (41.2)           | 109 (28.2)        | 149 (35.4)           | 116 (30.8)        |
| <b>Marital Status</b>                           |                      |                   |                      |                   |
| Married                                         | 232 (56.0)           | 162 (41.9)        | 243 (58.0)           | 168 (44.6)        |
| Never married                                   | 166 (40.1)           | 212 (54.8)        | 157 (37.5)           | 183 (48.5)        |
| Separated, divorced, or widowed                 | 16 (3.9)             | 13 (3.4)          | 19 (4.5)             | 26 (6.9)          |
| <b>Household Income</b>                         |                      |                   |                      |                   |
| Less than \$20,000                              | 121 (29.0)           | 161 (41.6)        | 105 (24.9)           | 156 (41.2)        |
| \$20,000-49,999                                 | 81 (19.4)            | 81 (20.9)         | 101 (24.0)           | 79 (20.8)         |
| \$50,000 or more                                | 83 (19.9)            | 44 (11.4)         | 98 (23.3)            | 68 (17.9)         |
| Unknown                                         | 132 (31.7)           | 101 (26.1)        | 117 (27.8)           | 76 (20.1)         |
| <b>Infant age at followup</b>                   |                      |                   |                      |                   |

|                                                 | <b>Study Group</b>   |                      |                      |                   |
|-------------------------------------------------|----------------------|----------------------|----------------------|-------------------|
| <b>Nursing Quality Improvement Intervention</b> | <b>Breastfeeding</b> | <b>Safe Sleep</b>    | <b>Breastfeeding</b> | <b>Safe Sleep</b> |
| <b>Mobile Health Intervention</b>               | <b>Breastfeeding</b> | <b>Breastfeeding</b> | <b>Safe Sleep</b>    | <b>Safe Sleep</b> |
| <b>maternal survey</b>                          |                      |                      |                      |                   |
| 8-11 weeks                                      | 255 (61.2)           | 253 (65.4)           | 238 (56.5)           | 209 (55.1)        |
| 12-15 weeks                                     | 72 (17.3)            | 51 (13.2)            | 83 (19.7)            | 79 (20.8)         |
| 16-19 weeks                                     | 42 (10.1)            | 44 (11.4)            | 44 (10.5)            | 35 (9.2)          |
| ≥20 weeks                                       | 48 (11.5)            | 39 (10.1)            | 56 (13.3)            | 56 (14.8)         |

**eTable 4.** Effects of the Nursing Quality Improvement and Mobile Health interventions by maternal survey at infant age  $\geq 60$  days, imputation analysis

|                                                       | <b>Study Group</b>                                                                          |                      |                      |                   |
|-------------------------------------------------------|---------------------------------------------------------------------------------------------|----------------------|----------------------|-------------------|
| <b>Nursing Quality Improvement (NQI) Intervention</b> | <b>Breastfeeding</b>                                                                        | <b>Safe Sleep</b>    | <b>Breastfeeding</b> | <b>Safe Sleep</b> |
| <b>Mobile Health (mHealth) Intervention</b>           | <b>Breastfeeding</b>                                                                        | <b>Breastfeeding</b> | <b>Safe Sleep</b>    | <b>Safe Sleep</b> |
| <b>Usual Sleep Position in Past 2 Weeks</b>           |                                                                                             |                      |                      |                   |
| <b>Usual Supine Sleep Position</b>                    | <b>N=400</b>                                                                                | <b>N=400</b>         | <b>N=400</b>         | <b>N=400</b>      |
| Unadjusted number and percent                         | 315 (78.8%)                                                                                 | 302 (75.5%)          | 348 (87.0%)          | 364 (90.9%)       |
| Adjusted NQI Effect*#                                 | aR <sub>C</sub> =78.8, aR <sub>NQI</sub> =81.6, aRD <sub>NQI</sub> =2.8 (-3.7, 7.9), p=0.38 |                      |                      |                   |
| Adjusted mHealth Effect#                              | aR <sub>C</sub> =78.8, aR <sub>mH</sub> =87.8, aRD <sub>mH</sub> =9.0 (4.2, 12.6), p=0.003  |                      |                      |                   |
| Test for Interaction^                                 | p=0.05                                                                                      |                      |                      |                   |
| <b>Usual Sleep Location in Past 2 Weeks</b>           |                                                                                             |                      |                      |                   |
| <b>Usual Room sharing without bedsharing</b>          | <b>N=400</b>                                                                                | <b>N=400</b>         | <b>N=400</b>         | <b>N=400</b>      |
| Unadjusted number and percent                         | 279 (69.7%)                                                                                 | 298 (74.6%)          | 316 (79.0%)          | 340 (85.0%)       |
| Adjusted NQI Effect#                                  | aR <sub>C</sub> =69.7, aR <sub>NQI</sub> =73.6, aRD <sub>NQI</sub> =3.9 (-1.1, 8.4), p=0.38 |                      |                      |                   |
| Adjusted mHealth Effect#                              | aR <sub>C</sub> =69.7, aR <sub>mH</sub> =81.7, aRD <sub>mH</sub> =12.0 (8.1, 15.3), p<0.001 |                      |                      |                   |
| Test for Interaction^                                 | p=0.55                                                                                      |                      |                      |                   |
| <b>Soft Bedding Use## in Past 2 Weeks</b>             |                                                                                             |                      |                      |                   |
| <b>No soft bedding use</b>                            | <b>N=400</b>                                                                                | <b>N=400</b>         | <b>N=400</b>         | <b>N=400</b>      |
| Unadjusted number and percent                         | 270 (67.4%)                                                                                 | 271 (67.7%)          | 310 (77.5%)          | 326 (81.6%)       |
| Adjusted NQI Effect#                                  | aR <sub>C</sub> =67.4, aR <sub>NQI</sub> =70.8, aRD <sub>NQI</sub> =3.4 (-2.6, 8.9), p=0.38 |                      |                      |                   |
| Adjusted mHealth Effect#                              | aR <sub>C</sub> =67.4, aR <sub>mH</sub> =79.1, aRD <sub>mH</sub> =11.7 (6.9, 15.8), p<0.001 |                      |                      |                   |
| Test for Interaction^                                 | p=0.50                                                                                      |                      |                      |                   |
| <b>Pacifier Use in Past 2 Weeks</b>                   |                                                                                             |                      |                      |                   |
| <b>Any pacifier use**</b>                             | <b>N=400</b>                                                                                | <b>N=400</b>         | <b>N=400</b>         | <b>N=400</b>      |
| Unadjusted number and percent                         | 241 (60.2%)                                                                                 | 264 (66.1%)          | 274 (68.6%)          | 295 (73.7%)       |

|                                                       | <b>Study Group</b>                                                                           |                      |                      |                   |
|-------------------------------------------------------|----------------------------------------------------------------------------------------------|----------------------|----------------------|-------------------|
| <b>Nursing Quality Improvement (NQI) Intervention</b> | <b>Breastfeeding</b>                                                                         | <b>Safe Sleep</b>    | <b>Breastfeeding</b> | <b>Safe Sleep</b> |
| <b>Mobile Health (mHealth) Intervention</b>           | <b>Breastfeeding</b>                                                                         | <b>Breastfeeding</b> | <b>Safe Sleep</b>    | <b>Safe Sleep</b> |
| Adjusted NQI Effect#                                  | aR <sub>C</sub> =60.2, aR <sub>NQI</sub> =65.9, aRD <sub>NQI</sub> =5.7 (-1.0, 11.9), p=0.38 |                      |                      |                   |
| Adjusted mHealth Effect#                              | aR <sub>C</sub> =60.2, aR <sub>mH</sub> =67.0, aRD <sub>mH</sub> =6.8 (0.0, 12.8), p=0.05    |                      |                      |                   |
| Test for Interaction <sup>^</sup>                     | p=0.84                                                                                       |                      |                      |                   |

\* Adjusted for infant age at survey and sex, and mother's age, parity, race, educational level, marital status, household income, and pre-study SAFE outcome rate (by hospital, pre-study SAFE rates not available for soft bedding use).

# Adjusted risk (aR) (%) for control group and intervention group; adjusted risk difference (aRD) calculated from odds ratios and confidence intervals from logistic regression. p-value from logistic regression adjusted for multiple outcome measures using Hochberg's method.

<sup>^</sup> p-value from test for multiplicative interaction in the logistic regression model

## Soft bedding included heavy blanket or quilt or comforter, rug, stuffed toys, cushion or pillow, adult sleeping bag, cloth diaper or towel, pad on top of sheet, bumpers, and sleep positioners or wedges.

\*\*Includes responses of "usually use pacifier" and "sometimes use pacifier."



**eTable 5.** Safe sleep outcomes of Breastfeeding Nursing Quality Improvement/Breastfeeding Mobile Health (control) and Safe Sleep Nursing Quality Improvement/Safe Sleep Mobile Health Groups, by race/ethnicity, when infant was  $\geq 60$  days of age\*

| <b>Intervention group<br/>Nursing Quality Improvement/Mobile<br/>Health</b> | <b>Infant care<br/>practice</b> | <b>All</b>     | <b>White</b>   | <b>Black</b> | <b>Hispanic</b> | <b>Other**</b> |
|-----------------------------------------------------------------------------|---------------------------------|----------------|----------------|--------------|-----------------|----------------|
|                                                                             | Sleep Position                  |                |                |              |                 |                |
| Breastfeeding/Breastfeeding                                                 | N=303                           | 243<br>(80.2%) | 82<br>(90.1%)  | 55 (66.3%)   | 82<br>(82.8%)   | 24 (80.0%)     |
| Safe Sleep/Safe Sleep                                                       | N=318                           | 294<br>(92.5%) | 116<br>(91.3%) | 60 (85.7%)   | 106 (97.2%)     | 12<br>(100%)   |
|                                                                             | Sleep<br>Location               |                |                |              |                 |                |
| Breastfeeding/Breastfeeding                                                 | N=291                           | 205<br>(70.5%) | 64<br>(72.7%)  | 53 (67.9%)   | 70<br>(73.7%)   | 18 (60.0%)     |
| Safe Sleep/Safe Sleep                                                       | N=313                           | 269<br>(85.9%) | 108<br>(85.7%) | 57 (86.4%)   | 93<br>(85.3%)   | 11 (91.7%)     |
|                                                                             | Pacifier Use -<br>Any           |                |                |              |                 |                |
| Breastfeeding/Breastfeeding                                                 | N=291                           | 174<br>(59.8%) | 53<br>(59.6%)  | 51 (66.2%)   | 57<br>(60.0%)   | 13 (43.3%)     |
| Safe Sleep/Safe Sleep                                                       | N=315                           | 240<br>(76.2%) | 100<br>(78.7%) | 46 (67.6%)   | 84<br>(77.8%)   | 10 (83.3%)     |
|                                                                             | No soft<br>bedding              |                |                |              |                 |                |

| <b>Intervention group<br/>Nursing Quality Improvement/Mobile<br/>Health</b> | <b>Infant care<br/>practice</b> | <b>All</b>     | <b>White</b>   | <b>Black</b> | <b>Hispanic</b> | <b>Other**</b> |
|-----------------------------------------------------------------------------|---------------------------------|----------------|----------------|--------------|-----------------|----------------|
| Breastfeeding/Breastfeeding                                                 | N=299                           | 202<br>(67.6%) | 69<br>(76.7%)  | 52 (65.0%)   | 60<br>(61.2%)   | 21 (67.7%)     |
| Safe Sleep/Safe Sleep                                                       | N=320                           | 262<br>(81.9%) | 106<br>(82.8%) | 56 (80.0%)   | 90<br>(81.8%)   | 10 (83.3%)     |

\*See eFigure for a graphical display of the frequency data

\*\*Note: 'Other' race/ethnicity group not included in eFigure

**eFigure.** Safe sleep outcomes of Breastfeeding Nursing Quality Improvement/Breastfeeding Mobile Health (control) and Safe Sleep Nursing Quality Improvement/Safe Sleep Mobile Health Groups, by race/ethnicity, when infant was >60 days of age

### Safe Sleep Outcomes by Race/Ethnicity\*

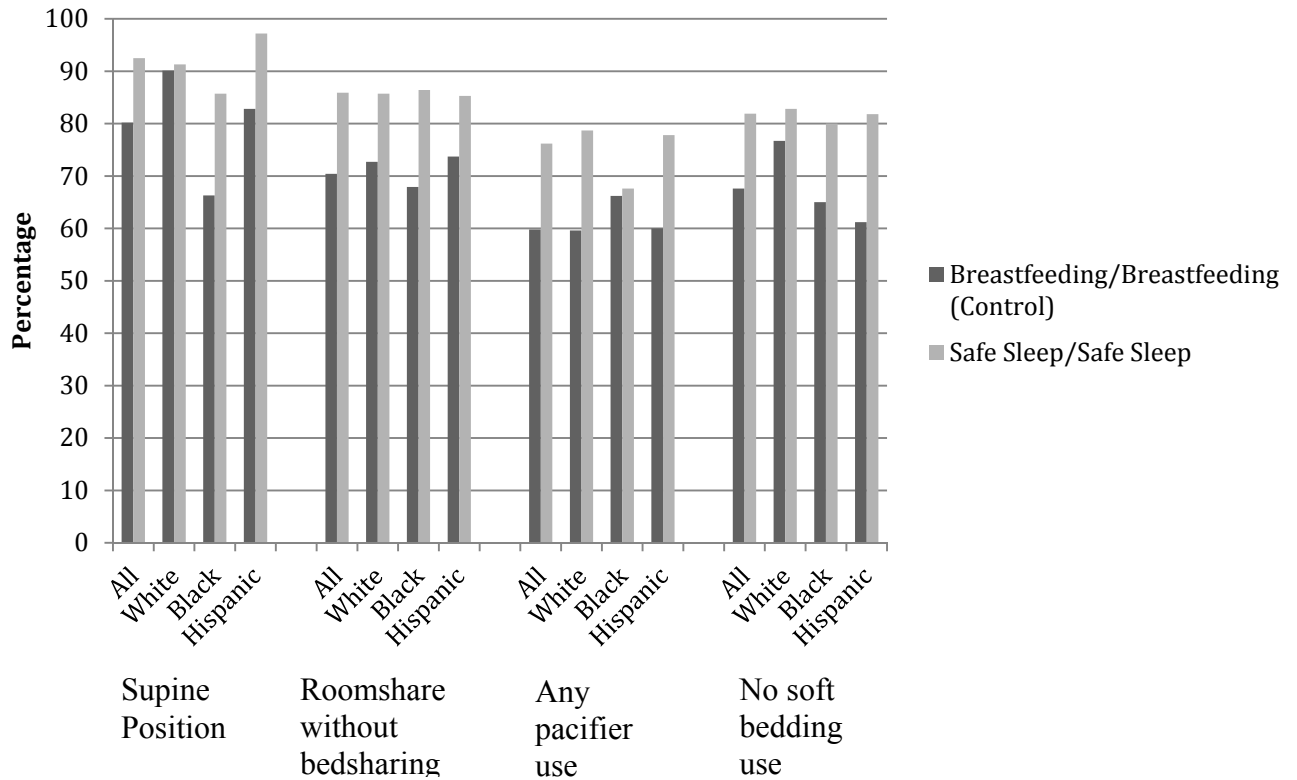

\*See eTable 5 for data on sample sizes.

**eReferences**

1. Eisenberg SR, Bair-Merritt MH, Colson ER, Heeren TC, Geller NL, Corwin MJ. Maternal Report of Advice Received for Infant Care. *Pediatrics* 2015;136:e315-22
2. Hwang SS, Rybin DV, Heeren TC, Colson ER, Corwin MJ. Trust in Sources of Advice about Infant Care Practices: The SAFE Study. *Matern Child Health J* 2016;20:1956-64
